# Supplementary material for: The neuropeptide sulfakinin is a peripheral regulator of insect behavioral switch between mating and foraging
Source: eLife journal article supplement (doi:10.7554/elife.100870), 2024-11-01
Supplement: fig2-data1 [file elife-100870-fig2-data1-v1.xlsx]

## Sheet: Figure 1A
Figure 1A
	Changes in the expression of neuropeptide system components in the antennae of starved flies
	Genes	Replicate 1	Replicate 2	Replicate 3	Replicate 4
	CCHamide1	1.36834	0.475177	0.729515	0.951452
	CCHamide1R	0.516095	0.73629	1.0925	1.05801
	GPB5	1.15756	0.46028	0.808678	0.905695
	GPB5R	0.887316	1.3198	0.50777	1.07606
	ITP-like peptide	1.51859	1.42064	1.43207	0.824396
	ITP-1	0.829811	0.831378	0.798187
	ITP-2	1.63712	1.39659	0.366902	0.194849
	Lecokinin	0.692164	0.996903	1.12288	0.508121
	LecokininR1	0.684614	0.750871	0.742719	0.888811
	LecokininR2	0.490673	0.202451	1.58163	0.258583
	SIFamide	1.53414	0.945363	1.15043	1.48212
	SIFamide R1	1.1291	1.13539	1.12726
	SIFamide R2	0.782047	0.935229	1.0755
	SIFamide R3	0.722589	1.02971	0.489449
	Sulfakinin	0.654863	0.962368	0.713275	0.972556
	SulfakininR1	1.2153	2.2383	1.59507
	SulfakininR2	0.771342	0.952622	0.928142	0.853274
	NPF1	0.954028	0.786046	0.791987	0.894604
	NPFR	0.92058	0.883363	0.956436	1.00387
	Burscion-beta-subunit	0.884676	1.12415	0.940533	1.31713
	Burscion-beta-subunitR	0.906413	0.784621	0.669333
	NPLP	1.03206	0.150505	0.0906867	0.0399242
	Tachykinin	0.381723	0.598942	1.81662	1.88178
	TachykininR	1.25095	0.883492	1.0234	1.05612
	sNPF	1.19066	1.09038	0.908888	1.0123
	sNPFR	1.34184	1.19378	1.12673
	Natalisin	1.08267	1.02048	1.10279	0.713341
	NatalisinR	1.1658	0.993709	1.01895	1.01364

## Sheet: Figure 1C
Figure 1C
	Mean velocity of flies representing each genotype during a 15-min observation period
	Replicates	WT	sk-/-	skr1-/-
	1	2	1	196
	2	28	6	246
	3	74	9	247
	4	230	42	884
	5	235	69	169
	6	243	76	189
	7	290	117	207
	8	423	117	421
	9	67	134	700
	10	68	166	369
	11	77	206	420
	12	113	130	451
	13	215	167	167
	14	231	333	390
	15	231	66	445
	16	799.25	318.75	1277.25
	17	531.37	1404.01	1417.9
	18	653.92	572.65	443.17
	19	421.01	479.38	875.11
	20	379.33	841.51	1136.81
	21	903.34	1065.31	744.56
	22	872.16	612.53	818.76
	23	444.94	968.65	1092.39
	24	1211.09	2839.22	1047.3
	25	1412.94	831.03	708.87
	26	249.97	304.09	989.97
	27	2982.37	1577.57	2598.24
	28	783.16	726.57	1141.14
	29	662.39	707.86	774.24
	30	950.89	1006.82	1189.54
	31	377.31	1880.08	1085.76
	32	180.31	877.02	3197.38
	33	935.67	734.07
	34	962.59	1076.32
	35	272.31	1053.94

## Sheet: Figure 1D
Figure 1D
	Knockout of sulfakinin and SkR1 increases food consumption in B. dorsalis at different times of day
	Replicates	WT-11:00	WT-16:00	WT-21:00		sk-/--11:00	sk-/--16:00	sk-/--21:00		skr1-/--9:00	skr1-/--16:00	skr1-/--21:00
	1	9.16429	4.70269	6.12229		7.84609	10.4825	9.77269		8.65729	8.25169	4.90549
	2	7.13629	6.83209	3.68869		2.57329	3.08029	5.51389		4.60129	4.19569	6.83209
	3	9.16429	6.93349	4.70269		7.84609	9.36709	5.51389		7.64329	8.35309	5.71669
	4	5.71669	6.32509	2.77609		12.0035	10.4825	3.28309		10.8881	9.26569	9.77269
	5	5.51389	5.20969	4.60129		8.25169	10.0769	7.23769		8.45449	10.2797	5.51389
	6	2.87749	4.39849	5.00689		7.44049	8.75869	5.10829		8.45449	9.67129	5.51389
	7	5.71669	3.79009	7.23769		7.03489	8.35309	5.51389		8.04889	8.04889	3.28309
	8	3.89149	7.13629	5.61529		9.16429	6.02089	5.91949		8.25169	7.03489	7.23769
	9	3.89149	6.32509	5.20969		8.75869	5.91949	5.61529		7.94749	6.83209	5.10829
	10	10.0769	6.73069	4.70269		8.45449	8.65729	3.89149		8.25169	9.26569	5.51389
	11	5.41249	6.73069	2.57329		7.44049	9.16429	5.91949		8.86009	8.55589	5.91949
	12	4.09429	10.6853	3.89149		10.8881	7.03489	5.51389		9.26569	6.83209	5.61529
	13	5.81809	5.51389	4.80409		8.65729	12.5105	4.49989		4.60129	12.3077	3.89149
	14	10.8881	7.84609	4.29709		8.65729	6.22369	5.31109		5.20969	7.03489	5.91949
	15	10.0769	7.44049	3.79009		7.64329	6.83209	4.90549		4.90549	6.83209	5.51389
	16	2.77609	4.90549	5.00689		7.64329	12.3077	6.83209		5.81809	12.1049	4.49989
	17	7.64329	7.94749	4.09429		6.62929	10.0769	5.71669		6.62929	10.0769	5.31109
	18	6.12229	5.51389	4.90549		11.3951	11.8007			11.9021	10.8881
	19	3.38449	8.25169	4.70269		12.9161	10.0769			10.9895	10.0769
	20	6.73069	7.03489	4.29709		11.3951	9.16429				9.67129
	21	8.96149	8.55589	2.37049		11.3951	12.3077				11.9021
	22	5.10829	4.90549	4.29709		10.4825	8.96149				8.25169
	23					8.86009	7.54189				8.45449
	24					9.46849	10.6853				10.2797
	25						7.13629
	26						5.71669
