# Supplementary material for: The neuropeptide sulfakinin is a peripheral regulator of insect behavioral switch between mating and foraging
Source: eLife. 2025 May 2;13:RP100870. doi: 10.7554/eLife.100870 (PMC12048153; doi:10.7554/eLife.100870)
Supplement: Figure 1—figure supplement 1—source data 1. [file elife-100870-fig1-figsupp1-data1.xlsx]

## Sheet: sheet1
	Successful foraging rate of fed females (%)
	Replicates	0 min	5 min	10 min	15 min
	1	0	0	5	5
	2	0	0	5	10
	3	0	0	5	5
	Successful foraging rate of females starved for 3 h (%)
	Replicates	0 min	5 min	10 min	15 min
	1	0	5	25	30
	2	0	10	15	25
	3	0	10	25	30
	Successful foraging rate of females starved for 6 h (%)
	Replicates	0 min	5 min	10 min	15 min
	1	0	15	20	40
	2	0	20	25	35
	3	0	20	30	45
	Successful foraging rate of females starved for 9 h (%)
	Replicates	0 min	5 min	10 min	15 min
	1	0	35	45	65
	2	0	40	55	80
	3	0	30	50	75
	Successful foraging rate of females starved for 12 h (%)
	Replicates	0 min	5 min	10 min	15 min
	1	0	45	65	85
	2	0	40	75	90
	3	0	40	75	90
