# Supplementary material for: The neuropeptide sulfakinin is a peripheral regulator of insect behavioral switch between mating and foraging
Source: eLife. 2025 May 2;13:RP100870. doi: 10.7554/eLife.100870 (PMC12048153; doi:10.7554/eLife.100870)
Supplement: Figure 1—figure supplement 2—source data 1. [file elife-100870-fig1-figsupp2-data1.xlsx]

## Sheet: Sheet1
	Figure 1-Figure Supplement 2-Source Data1
	EAG responses of fed and starved flies to food relevant odors and sex pheromones at three concentrations
	Ethyl benzoate								Diethyl maleate								Ethyl butyrate
	Replicates	Fed males-0.1% (mV)	Fed males-1% (mV)	Fed males-10% (mV)	Starved males-0.1% (mV)	Starved males-1% (mV)	Starved males-10% (mV)		Replicates	Fed males-0.1% (mV)	Fed males-1% (mV)	Fed males-10% (mV)	Starved males-0.1% (mV)	Starved males-1% (mV)	Starved males-10% (mV)		Replicates	Fed males-0.1% (mV)	Fed males-1% (mV)	Fed males-10% (mV)	Starved males-0.1% (mV)	Starved males-1% (mV)	Starved males-10% (mV)
	1	0.93	0.98	1.66	0.07	0.74	2.6		1	1.14	1.13	1.57	0.36	0.38	0.4		1	0.14	0.92	3.26	0.803	1.803	4.543
	2	0.09	0.14	0.34	0.474	0.584	2.614		2	0.55	0.66	0.86	0.8	1.43	1.98		2	0.17	0.7	2.74	0.38	1.3	4.13
	3	0.39	1.16	1.57	0.29	0.88	2.33		3	0.49	0.97	1.07	0.294	0.474	0.794		3	0.2	0.93	2.51	0.18	1.2	4.75
	4	0	0.89	1.25	0.32	0.46	0.83		4	1.17	1.33	1.75	-0.03	0.24	0.45		4	0.15	0.87	3.35	0.35	1.41	4.81
	5	0.57	1.17	1.51	0.49	1.1	2.04		5	0.21	0.68	1.02	0.2	0.24	0.32		5	0.3	1.41	4.51	0.5	1.98	5.78
	6	0.356	0.706	2.006	0.06	0.61	2.04		6	0.62	1.05	1.81	0.15	0.73	0.98		6	0.03	0.07	1.11	0.64	1.78	5.28
	7	0.8	1.86	2.27	0.37	1.04	1.6		7	0.31	0.65	1.3	0.61	0.8	0.85		7				0.6	1.66	4.98
	8	0.61	1.18	1.55	0.6	1.41	2.94		8	1.14	1.33	1.49					8				0.4	1.66	5.44
	9				0.47	0.59	1.5										9				0.47	1.55	4.24
	Geraniol								1-octen-3-ol								4-carvomenthenol
	Replicates	Fed males-0.1% (mV)	Fed males-1% (mV)	Fed males-10% (mV)	Starved males-0.1% (mV)	Starved males-1% (mV)	Starved males-10% (mV)		Replicates	Fed males-0.1% (mV)	Fed males-1% (mV)	Fed males-10% (mV)	Starved males-0.1% (mV)	Starved males-1% (mV)	Starved males-10% (mV)		Replicates	Fed males-0.1% (mV)	Fed males-1% (mV)	Fed males-10% (mV)	Starved males-0.1% (mV)	Starved males-1% (mV)	Starved males-10% (mV)
	1	0.66	1.17	1.99	0.42	0.95	1.46		1	1.32	1.8	2.91	0.35	0.37	0.63		1	0.19	0.51	1.58	0.14	0.78	6.32
	2	0.08	0.44	1.39	0.114	0.454	0.834		2	0.27	0.68	1.57	0.92	2.3	4.51		2	0.72	0.91	2.56	0.41	0.72	2.14
	3	0.46	1.08	2.61	0.83	2.25	2.33		3	1.06	1.37	2.76	0.224	0.804	2.054		3	0.7	1.03	1.81	0.8	1.2	2.68
	4	0.14	1.35	2.57	0.07	0.26	0.95		4	0.38	1.46	2.89	-0.02	-0.05	0.98		4	0.51	0.72	1.36	0.07	0.56	1.27
	5	-0.19	0.76	2.08	0.73	1.3	1.6		5	0.24	0.52	1.62	0.05	1.15	3.1		5	0.721	1.471	2.381	1.377	1.367	2.787
	6	0.576	0.916	1.906	1.07	1.84	3.28		6	0.29	0.91	1.88	1	1.62	2.83		6	0.84	1.31	2.21	0.99	1.53	2.38
	7	0.38	1.13	1.94	0.89	1.34	1.41		7	0.55	1.7	3.32	0.18	0.34	1.39		7	0.84	0.98	2.39	0.42	0.59	1.54
	8	-0.12	0.98	2.22	1.21	1.76	2.93		8	0.47	0.94	2.26					8	0.464	0.494	1.534	0.82	0.92	2.1
	9				0.37	1.25	3.01
	Citronellal								Trans-2-hexenal								Methyl eugenol
	Replicates	Fed males-0.1% (mV)	Fed males-1% (mV)	Fed males-10% (mV)	Starved males-0.1% (mV)	Starved males-1% (mV)	Starved males-10% (mV)		Replicates	Fed males-0.1% (mV)	Fed males-1% (mV)	Fed males-10% (mV)	Starved males-0.1% (mV)	Starved males-1% (mV)	Starved males-10% (mV)		Replicates	Fed males-0.1% (mV)	Fed males-1% (mV)	Fed males-10% (mV)	Starved males-0.1% (mV)	Starved males-1% (mV)	Starved males-10% (mV)
	1	-0.02	0.51	2.03	0.24	0.61	1.87		1	1.3	1.16	6.05	-0.51	-0.51	-0.51		1	1.1	2.66	3.38	2.03	5.36	7.01
	2	0.97	1.77	3.26	0.63	1.88	4.01		2	1.42	2.11	6.25	2.18	2.35	7.66		2	0.21	1.84	3.01	1.71	5.03	7.34
	3	1.13	2.22	3.58	1.09	1.91	3.3		3	2.9	1.87	6.55	2.55	2.04	5.78		3	1.23	2.79	3.89	1.64	4.32	6.82
	4	0.63	1.42	3.71	0.4	0.78	2.36		4	3.23	3.35	9.24	2.08	2.12	6.25		4	0.43	3.78	5.58	1.91	3.97	5.75
	5	1.081	2.041	3.771	1.067	1.777	2.917		5	3.941	3.531	8.141	2.647	3.167	6.907		5	1.1	2.72	3.86	1.26	3.25	5.48
	6	0.95	1.34	2.36	1.47	2.86	4.76		6	2.46	1.95	4.95	4.13	4.43	8.91		6				2.39	5.93	8.26
	7	0.94	1.45	3.28	0.81	1.63	3.52		7	3.11	3.77	8.25	2.36	2.12	6.83		7				2.03	4.75	6.76
	8	0.564	1.394	2.554	0.75	1.49	2.72		8	1.244	1.264	5.044	2.36	2.43	6.83		8				1.68	3.58	5.13
	9																9				2.02	4.99	6.52
	β-caryophyllene								R-(+)-limonene								3,7-dimethylacetic acid
	Replicates	Fed males-0.1% (mV)	Fed males-1% (mV)	Fed males-10% (mV)	Starved males-0.1% (mV)	Starved males-1% (mV)	Starved males-10% (mV)		Replicates	Fed males-0.1% (mV)	Fed males-1% (mV)	Fed males-10% (mV)	Starved males-0.1% (mV)	Starved males-1% (mV)	Starved males-10% (mV)		Replicates	Fed males-0.1% (mV)	Fed males-1% (mV)	Fed males-10% (mV)	Starved males-0.1% (mV)	Starved males-1% (mV)	Starved males-10% (mV)
	1	0.41	1.06	0.97	1.22	1.54	1.77		1	0.58	1.03	1.88	0.36	1.3	2.58		1	-0.21	0.4	1.03	0.91	1.23	1.63
	2	0.39	1.04	1.02	0.43	0.57	0.75		2	0.53	1.16	2.87	0.6	1.52	3.47		2	0.84	1.2	2.78	1.51	1.04	2.03
	3	0.22	0.54	0.7	0.55	0.77	0.96		3	0.71	1.51	2.91	1.13	1.53	3.47		3	-0.14	0.3	0.75	0.47	0.44	0.81
	4	0.26	0.74	1.2	0.49	1.09	1.18		4	0.56	0.91	2.9	0.13	0.32	2.53		4	0.36	0.76	0.78	0.43	0.83	1.19
	5	0.34	0.57	0.91	0.41	0.91	1.13		5	0.841	1.401	3.581	0.667	1.467	2.907		5	0.27	0.71	1.34	0.58	1.1	1.2
	6				0.53	0.64	1.35		6	0.79	1.22	2.82	0.9	1.69	3.95		6	0.35	0.49	0.66	1.11	1.55	1.79
	7				0.48	0.54	1.33		7	0.98	1.59	3.41	0.75	1.27	2.88		7	0.91	1.51	1.82	1.59	1.29	1.91
	8				0.39	0.5	1.04		8	0.864	1.004	2.034	0.92	1.54	3.13		8	0.44	0.37	0.46	0.99	2.03	1.65
	9				0.27	0.54	1.01
	2,3,5-trimethyl pyrazine								2,3,5,6-tetramethylpyrazine
	Replicates	Fed females-0.1% (mV)	Fed females-1% (mV)	Fed females-10% (mV)	Starved females-0.1% (mV)	Starved females-1% (mV)	Starved females-10% (mV)		Replicates	Fed females-0.1% (mV)	Fed females-1% (mV)	Fed females-10% (mV)	Starved females-0.1% (mV)	Starved females-1% (mV)	Starved females-10% (mV)
	1	1.53	2.91	5.5	0.97	1.33	2.62		1	2.33	2.83	4.45	0.31	0.57	1.25
	2	1.02	2.53	6.32	0.26	0.55	1.02		2	1.02	2.38	5.53	0.03	0.25	0.87
	3	0.36	1.71	5.18	0.53	0.65	3.12		3	1.14	1.38	3.76	-0.52	0.22	1.69
	4	0.46	1.14	4.25	0.52	0.7	3.74		4	0.45	1.19	3.57	0.06	0.54	2.32
	5	0.5	1.08	4.53	0.59	0.54	3.33		5	0.34	1.07	3.79	0.2	0.66	3.25
	6	0.41	1.02	5.73	0.6	0.4	3.49		6	0	0.6	5.03	0.03	0.26	2.73
	7	1.22	1.83	6.07	0.84	2	3.81		7	1.2	0.97	4.58	0.13	0.41	2.85
	8	1.21	3.05	6.7	0.61	1.31	3.56		8	0.35	1.7	5.01	0.66	0.96	3.23
	9	0.4109	0.7209	3.4809	0.42	1.08	3.52		9	1.7109	0.2309	2.1609	0.21	0.54	2.26
	10	0.98	2.51	6.45	0.46	1.37	3.33		10	0.43	0.89	3.39	0.2	0.27	2.31
	Ethyl laurate								Ethyl myristate								Ethyl palmitate
	Replicates	Fed males-0.1% (mV)	Fed males-1% (mV)	Fed males-10% (mV)	Starved males-0.1% (mV)	Starved males-1% (mV)	Starved males-10% (mV)		Replicates	Fed males-0.1% (mV)	Fed males-1% (mV)	Fed males-10% (mV)	Starved males-0.1% (mV)	Starved males-1% (mV)	Starved males-10% (mV)		Replicates	Fed males-0.1% (mV)	Fed males-1% (mV)	Fed males-10% (mV)	Starved males-0.1% (mV)	Starved males-1% (mV)	Starved males-10% (mV)
	1	1.07	0.25	0.78	0.209	0.499	1.239		1	0.19	0.21	0.36	0.299	0.459	0.869		1	0.15	0.16	0.44	0.139	0.179	0.499
	2	0.25	0.54	1.41	0.21	0.56	0.95		2	0.22	0.55	1.22	0.44	0.52	0.85		2	0.21	0.2	0.9	0.19	0.32	0.63
	3	0.71	1.27	3	0.12	0.29	0.51		3	0.89	1.63	2.39	0.18	0.27	0.62		3	0.78	0.54	2.55	0.16	0.2	0.43
	4	0.39	1.01	1.91	0.17	0.15	0.73		4	0.48	0.94	1.61	0.09	0.14	0.24		4	0.35	0.6	1.5	-0.017	0.1	0.34
	5	0.18	0.67	1.57	0.04	0.16	0.86		5	0.3	0.5	0.86	0.09	0.19	0.74		5	0.29	0.34	0.96	0.03	0.12	0.41
	6	0.17	0.81	2.03	0.08	0.04	0.36		6	0.45	0.78	1.89	-0.09	0.05	0.47		6	0.3	1.6	1.2	-0.05	-0.03	-0.13
	7	0.24	0.51	1.26	0.11	0.22	0.66		7	0.24	0.73	1.22	-0.1948	0	0.23		7	0.24	0.33	0.8	-0.08	0	0.59
	8	0.45	1.14	2.46	0.02	0.19	1.15		8	0.49	1.3	1.65	0.09	0.17	0.72		8	0.17	0.27	0.94	0.01	0.09	0.3
	9	0.38	0.63	1.47	-0.06	0.23	1.08		9	0.44	0.65	1.23	-0.01	0.27	0.89		9	0.48	0.41	1.12	-0.03	-0.02	0.3
	10	0.38	0.76	1.77	0.17	0.23	0.78		10	0.38	1.06	1.75	0.08	0.22	0.8		10	0.62	0.62	1.68	0.04	0.08	0.29
