# Supplementary material for: The neuropeptide sulfakinin is a peripheral regulator of insect behavioral switch between mating and foraging
Source: eLife. 2025 May 2;13:RP100870. doi: 10.7554/eLife.100870 (PMC12048153; doi:10.7554/eLife.100870)
Supplement: Figure 1—source data 1. [file elife-100870-fig1-data1.xlsx]

## Sheet: Figure 1D
	Figure 1D
		Successful foraging rate of fed males (%)
		Replicates	0 min	5 min	10 min	15 min
		1	0	0	5	5
		2	0	0	10	10
		3	0	0	5	5
		Successful foraging rate of males starved for 3 h (%)
		Replicates	0 min	5 min	10 min	15 min
		1	0	10	25	30
		2	0	10	15	15
		3	0	15	25	30
		Successful foraging rate of males starved for 6 h (%)
		Replicates	0 min	5 min	10 min	15 min
		1	0	15	20	40
		2	0	15	25	25
		3	0	20	30	45
		Successful foraging rate of males starved for 9 h (%)
		Replicates	0 min	5 min	10 min	15 min
		1	0	30	40	60
		2	0	35	55	70
		3	0	30	50	75
		Successful foraging rate of males starved for 12 h (%)
		Replicates	0 min	5 min	10 min	15 min
		1	0	40	60	80
		2	0	35	75	80
		3	0	40	70	90

## Sheet: Figure 1E
Figure 1E
	EAG responses to artifical food (mV)
	Replicates	Fed males	Starved males
	1	0.98	1.89
	2	2.09	2.03
	3	0.43	2.12
	4	0.91	1.36
	5	0.45	0.62
	6	0.38	1.14
	7	0.54	0.74
	8	1.03	0.62
	9	1.13	2.18
	10	0.61	1.97
	11	0.75	1.02

## Sheet: Figure 1F
Figure 1F
	EAG responses to artifical food (mV)
	Replicates	Fed females	Starved females
	1	1.98	1.89
	2	1.04	2.1
	3	1.32	2.3
	4	1.12	1.14
	5	0.35	0.83
	6	0.78	1.3
	7	0.56	0.83
	8	1.23	1.23
	9	1.03	1.98
	10	0.82	1.82
	11	0.55	1.5

## Sheet: Figure 1G
	Figure 1G
		Cumulative courtship rate within a 15-min observation period of flies starved for different durations (%)
		Time	Fed (78)	3 h (76)	6 h (79)	9 h (83)	12 h (93)
		0	0	0	0	0	0
		1	10.2564	7.89474	6.49351	6.0241	1.07527
		2	20.5128	17.1053	14.2857	15.6627	5.37634
		3	24.359	21.0526	23.3766	21.6867	6.45161
		4	30.7692	25	28.5714	21.6867	7.52688
		5	34.6154	26.3158	33.7662	21.6867	8.60215
		6	37.1795	28.9474	37.6623	22.8916	13.9785
		7	38.4615	32.8947	38.961	22.8916	16.129
		8	41.0256	34.2105	42.8571	25.3012	16.129
		9	43.5897	36.8421	44.1558	25.3012	18.2796
		10	46.1538	36.8421	44.1558	25.3012	22.5806
		11	48.7179	40.7895	46.7532	25.3012	24.7312
		12	52.5641	44.7368	49.3506	25.3012	24.7312
		13	52.5641	47.3684	53.2468	26.506	26.8817
		14	53.8462	47.3684	54.5455	26.506	27.957
		15	53.8462	47.3684	54.5455	26.506	30.1075

## Sheet: Figure 1H
	Figure 1H
		Cumulative copulation rate within a 15-min observation period of flies starved for different durations (%)
		Time	Fed (78)	3 h (76)	6 h (79)	9 h (83)	12 h (93)
		0	0	0	0	0	0
		1	10.2564	10.5263	1.28205	9.52381	2.1978
		2	23.0769	27.6316	15.3846	23.8095	6.59341
		3	26.9231	30.2632	24.359	32.1429	9.89011
		4	33.3333	36.8421	30.7692	36.9048	15.3846
		5	37.1795	38.1579	32.0513	38.0952	18.6813
		6	39.7436	39.4737	37.1795	42.8571	24.1758
		7	41.0256	43.4211	38.4615	45.2381	25.2747
		8	43.5897	47.3684	41.0256	45.2381	28.5714
		9	46.1538	47.3684	44.8718	45.2381	31.8681
		10	48.7179	47.3684	46.1538	45.2381	36.2637
		11	51.2821	51.3158	50	45.2381	39.5604
		12	56.4103	53.9474	52.5641	46.4286	40.6593
		13	56.4103	56.5789	56.4103	47.6191	42.8571
		14	57.6923	56.5789	56.4103	47.6191	43.956
		15	57.6923	56.5789	57.6923	48.8095	47.2527

## Sheet: Figure 1I
Figure 1I
	EAG responses to male body extract (mV)
	Replicates	Fed females	Starved females
	1	2.12	1.37
	2	2.04	0.86
	3	2.33	0.63
	4	1.24	0.61
	5	1.47	0.5
	6	1.84	0.45
	7	1.68	0.11
	8	0.78	0.34
	9	0.55	0.95
	10	0.63	0.41
	11	1.34	0.28
	12	1.32

## Sheet: Figure 1J
Figure 1J
	EAG responses to male body extract (mV)
	Replicates	Fed females	Starved females
	1	0.62	0.29
	2	0.79	0.24
	3	1.81	0.34
	4	1.45	0.3
	5	1.21	0.11
	6	1.82	0.18
	7	0.76	0.63
	8	1	0.69
	9	0.57	0.72
	10	0.6	0.83
	11		0.49
	12		0.62
