# Supplementary material for: The neuropeptide sulfakinin is a peripheral regulator of insect behavioral switch between mating and foraging
Source: eLife. 2025 May 2;13:RP100870. doi: 10.7554/eLife.100870 (PMC12048153; doi:10.7554/eLife.100870)
Supplement: Figure 2—figure supplement 1—source data 1. [file elife-100870-fig2-figsupp1-data1.xlsx]

## Sheet: supplement 1
Figure 2-figure supplement 1
	Refeeding after 12h starvation decreases SkR1 transcript
	Replicatess	Starved	Fed
	1	0.6358	0.34201
	2	0.75378	0.43644
	3	0.56617	0.32217
	4	0.71397	0.41151
