# Supplementary material for: The neuropeptide sulfakinin is a peripheral regulator of insect behavioral switch between mating and foraging
Source: eLife. 2025 May 2;13:RP100870. doi: 10.7554/eLife.100870 (PMC12048153; doi:10.7554/eLife.100870)
Supplement: Figure 2—figure supplement 4—source data 1. [file elife-100870-fig2-figsupp4-data1.xlsx]

## Sheet: supplement 4
Figure 2-figure supplement 4
	Knockout of Sk did not affect the body length of B. dorsalis
	Replicates	WT females (mm)	sk-/- females (mm)	WT males (mm)	sk-/- males (mm)
	1	7.41	7.85	7.04	7.11
	2	7.26	7.11	7.02	7.06
	3	7.56	7.49	6.91	7.43
	4	7.41	7.16	7.13	6.28
	5	7.39	7.6	6.76	6.87
	6	7.25	7.7	7.39	7.16
	7	7.68	7.58	7.52	7.32
	8	7.76	7.62	7.06	7.39
	9	7.74	7.46	7.22	7.32
	10	6.88	7.35	6.85	6.95
	11	7.74	7.79	6.81	7.58
	12	7.62	7.18	7.48	6.88
	13	7.55	7.53	7.01	6.6
	14	7.04	7.51	6.92	6.65
	15		7.37	7.22
	16		7.85	6.88
	17		7.48	6.76
	18		7.07	7.07
	19		7.2	6.72
	20		7	7.04
	21		7.46
