# Supplementary material for: The neuropeptide sulfakinin is a peripheral regulator of insect behavioral switch between mating and foraging
Source: eLife. 2025 May 2;13:RP100870. doi: 10.7554/eLife.100870 (PMC12048153; doi:10.7554/eLife.100870)
Supplement: Figure 3—figure supplement 1—source data 1. [file elife-100870-fig3-figsupp1-data1.xlsx]

## Sheet: Figure Supplement 1A
	Figure 3–Figure Supplement 1A
		Successful foraging rate of starved WT females (%)
		Replicates	0 min	5 min	10 min	15 min
		1	0	50	65	90
		2	0	40	50	100
		3	0	50	80	95
		Successful foraging rate of s starved sk+/- females (%)
		Replicates	0 min	5 min	10 min	15 min
		1	0	30	40	80
		2	0	50	80	80
		3	0	50	90	100

## Sheet: Figure Supplement 1B
	Figure 3–Figure Supplement 1B
		Successful foraging rate of starved WT males (%)
		Replicates	0 min	5 min	10 min	15 min
		1	0	50	60	80
		2	0	30	75	75
		3	0	50	55	90
		Successful foraging rate of s starved sk+/- males (%)
		Replicates	0 min	5 min	10 min	15 min
		1	0	40	70	80
		2	0	45	65	80
		3	0	55	80	90

## Sheet: Figure Supplement 1C
	Figure 3–Figure Supplement 1C
		Cumulative copulation rates within a 15-min observation period of starved WT and Sk heterozygous flies (%)
		Time	Starved WT (55)	Starved sk+/- (44)
		0	0	0
		1	1.81818	2.27273
		2	5.45455	6.81818
		3	5.45455	9.09091
		4	7.27273	9.09091
		5	9.09091	9.09091
		6	14.5455	13.6364
		7	14.5455	13.6364
		8	14.5455	18.1818
		9	16.3636	18.1818
		10	20	18.1818
		11	23.6364	18.1818
		12	23.6364	20.4545
		13	25.4545	20.4545
		14	25.4545	22.7273
		15	25.4545	25

## Sheet: Figure Supplement 1D
	Figure 3–Figure Supplement 1D
		Cumulative courtship rates within a 15-min observation period of starved WT and Sk heterozygous flies (%)
		Time	Starved WT (55)	Starved sk+/- (44)
		0	0	0
		1	3.63636	2.27273
		2	7.27273	6.81818
		3	9.09091	9.09091
		4	16.3636	11.3636
		5	20	11.3636
		6	25.4545	22.7273
		7	25.4545	27.2727
		8	29.0909	27.2727
		9	32.7273	29.5455
		10	34.5455	31.8182
		11	40	34.0909
		12	40	36.3636
		13	41.8182	36.3636
		14	41.8182	38.6364
		15	43.6364	43.1818
