# Supplementary material for: The neuropeptide sulfakinin is a peripheral regulator of insect behavioral switch between mating and foraging
Source: eLife. 2025 May 2;13:RP100870. doi: 10.7554/eLife.100870 (PMC12048153; doi:10.7554/eLife.100870)
Supplement: Figure 3—figure supplement 2—source data 1. [file elife-100870-fig3-figsupp2-data1.xlsx]

## Sheet: Sheet1
	Figure 3-Figure Supplement 2-Source Data1
	EAG responses of starved flies with different genotypes to food relevant odors and sex pheromones at three concentrations
	Ethyl benzoate
	Replicates	Starved WT males-0.1% (mV)	Starved WT males-1% (mV)	Starved WT males-10% (mV)	Starved sk-/- males-0.1% (mV)	Starved sk-/- males-1% (mV)	Starved sk-/- males-10% (mV)	Starved skr1-/- males-0.1% (mV)	Starved skr1-/- males-1% (mV)	Starved skr1-/- males-10% (mV)
	1	0.17	0.74	2.6	0.05	0.11	0.21	0.32	0.51	0.58
	2	0.474	0.584	3.614	0.06	0.21	0.33	0.268	0.498	0.678
	3	0.29	0.88	2.33	0.06	0.02	0.19	0.6	0.58	0.9
	4	0.32	0.46	0.83	0.07	0.19	0.28	0.19	0.41	0.53
	5	0.49	1.1	2.04	0.06	0.19	0.24	0.01	0.54	0.38
	6	0.16	0.61	2.04					0.4	0.9
	7	0.37	1.04	1.6
	8	0.4	1.41	1.94
	9	0.47	0.59	1.5
	Diethyl maleate
	Replicates	Starved WT males-0.1% (mV)	Starved WT males-1% (mV)	Starved WT males-10% (mV)	Starved sk-/- males-0.1% (mV)	Starved sk-/- males-1% (mV)	Starved sk-/- males-10% (mV)	Starved skr1-/- males-0.1% (mV)	Starved skr1-/- males-1% (mV)	Starved skr1-/- males-10% (mV)
	1	0	0.4	1.16	0.15	0.51	0.71	0.06	0.17	0.66
	2	1.36	1.71	2.74	0.03	0.25	0.23	0.18	0.91	2.52
	3	0.56	1.43	1.48	0.06	0.64	1.05	0.06	0.27	0.83
	4	0.41	0.46	1.33	0.12	0.84	1.26	0.2	0.64	1.52
	5	1.1	0.98	2.36	0	0.04	0.06	0.12	0.33	0.69
	6	0.42	1.68	1.31	0.19	0.77	1.27	0.08	0.37	0.86
	7	0.93	2.28	2.91	0.01	1.06	1.34	0.2	0.56	1.43
	8	0.82	1.92	2.15	0.31	0.76	0.85	0.36	0.78	1.74
	9	0.24	1.03	1.54	0.52	1.14	1.52	0.32	0.49	0.75
	10	0.65	1.96	2.21	0.05	0.51	0.79
	Ethyl butyrate
	Replicates	Starved WT males-0.1% (mV)	Starved WT males-1% (mV)	Starved WT males-10% (mV)	Starved sk-/- males-0.1% (mV)	Starved sk-/- males-1% (mV)	Starved sk-/- males-10% (mV)	Starved skr1-/- males-0.1% (mV)	Starved skr1-/- males-1% (mV)	Starved skr1-/- males-10% (mV)
	1	0.37	1.44	3.61	0.16	0.56	1.46	0.08	0.76	2.18
	2	0.52	3.61	7.67	0.38	0.94	2.17	1.64	3.04	5.18
	3				0	0.17	1.24	0.28	0.81	2.81
	4	0.72	1.32	6.46	1.5	2.06	4.38	0.48	1.1	1.85
	5	1.4	4.18	8.18	0.56	1.09	2.22	0.65	1.56	3.66
	6	0.22	1.15	2.75	0.76	1.3	4.33	0	0.39	1.89
	7	0.74	2.42	5.91	0.29	1.1	2.68	0.53	0.69	2.57
	8	0.68	2	3.87	1.04	2.2	5.48	0.23	1.54	2.81
	9	0.67	2.17	3.47	0.74	1.36	1.84	0.67	1.49	4.86
	10	0.89	2.32	7	1.31	2.06	5.08	0.76	1.39	4.6
	Methyl eugenol
	Replicates	Starved WT males-0.1% (mV)	Starved WT males-1% (mV)	Starved WT males-10% (mV)	Starved sk-/- males-0.1% (mV)	Starved sk-/- males-1% (mV)	Starved sk-/- males-10% (mV)	Starved skr1-/- males-0.1% (mV)	Starved skr1-/- males-1% (mV)	Starved skr1-/- males-10% (mV)
	1	2.65	5.94	6.98	1.55	4.2	5.02	0.4	2.85	1.26
	2	3.57	6.97	6.76	0.44	2.89	4.71	2.12	4.86	8.69
	3	1.173	3.003	4.553	0.27	1.35	1.86	0.09	0.41	0.94
	4	2.66	7.28	9.65	0.41	1.3	4.03	0.42	3.35	2.11
	5	0.87	2.41	4.01	0.16	0.7	2.11	1.87	4.34	4.81
	6	1.46	5.17	8.12	0.49	3.11	3.95	0.51	4.45	7.46
	7	0.87	4.51	7.49	0.23	1.1	1.26	0.13	0.46	0.75
	8	1.95	5.84	8.2	1.32	3.69	4.55	0.42	3.19	4.86
	9	1.33	5.02	9.27	0.18	0.31	1.65	0.63	3.2	5.65
	10	2.63	6.75	11.68				0.27	1.59	2.93
	2,3,5-trimethyl pyrazine
	Replicates	Starved WT females-0.1% (mV)	Starved WT females-1% (mV)	Starved WT females-10% (mV)	Starved sk-/- females-0.1% (mV)	Starved sk-/- females-1% (mV)	Starved sk-/- females-10% (mV)	Starved skr1-/- females-0.1% (mV)	Starved skr1-/- females-1% (mV)	Starved skr1-/- females-10% (mV)
	1	0.97	1.33	2.62	0.76	1.91	5.11	1.126	2.506	6.976
	2	0.26	0.55	1.02	0.39	1.48	4.45	0.98	3.4	8.28
	3	0.53	0.65	3.12	0.53	1.38	4.11	1.27	3.25	7.18
	4	0.52	0.7	3.74	0.64	2.11	5.12	6.44	2.22	5.88
	5	0.59	0.54	3.33	1.08	2.56	4.82	0.94	2.38	7.15
	6	0.6	0.4	3.49	0.79	1.16	3.8	0.6	2.19	7.85
	7	0.84	2	3.81	1.21	1.04	5.18	0.74	1.24	5.38
	8	0.61	1.31	3.56	0.64	0.97	4.4	1	1.54	5.43
	9	0.42	1.08	3.52	1.86	3.37	10.37	0.79	1.4	6.21
	10	0.46	1.37	3.33	0.63	1.96	6.75	0.95	1.56	5.25
	2,3,5,6-tetramethylpyrazine
	Replicates	Starved WT females-0.1% (mV)	Starved WT females-1% (mV)	Starved WT females-10% (mV)	Starved sk-/- females-0.1% (mV)	Starved sk-/- females-1% (mV)	Starved sk-/- females-10% (mV)	Starved skr1-/- females-0.1% (mV)	Starved skr1-/- females-1% (mV)	Starved skr1-/- females-10% (mV)
	1	0.31	0.57	1.25	0.48	0.59	3.38	0.816	0.676	3.816
	2	0.03	0.25	0.87	0.37	1.12	4.27	1.12	1.34	6.26
	3	-0.52	0.22	1.69	0.2	-0.467	2.99	0.99	3.24	7.33
	4	0.06	0.54	2.32	0.84	0.98	4.6	0.72	1.45	4.82
	5	0.2	0.66	3.25	0.5	0.6	4.05	0.23	0.38	2.86
	6	0.03	0.26	2.73	-0.178	0.17	2.6	0.59	1.48	5.92
	7	0.13	0.41	2.85	-0.03	0.11	5.07	0.17	0.6	3.69
	8	0.66	0.96	3.23	0.28	0.57	3.36	0.44	0.89	3.75
	9	0.21	0.54	2.26	0.56	1.54	8.66	0.25	0.91	4.86
	10	0.2	0.27	2.31	0.94	1.44	4.53	0.25	0.7	4.27
	Ethyl laurate
	Replicates	Starved WT males-0.1% (mV)	Starved WT males-1% (mV)	Starved WT males-10% (mV)	Starved sk-/- males-0.1% (mV)	Starved sk-/- males-1% (mV)	Starved sk-/- males-10% (mV)	Starved skr1-/- males-0.1% (mV)	Starved skr1-/- males-1% (mV)	Starved skr1-/- males-10% (mV)
	1	0.209	0.499	1.239	0.34	0.6	1.6	0.18	0.44	1.16
	2	0.21	0.56	0.95	0.3	0.93	1.92	0.21	0.75	1.75
	3	0.12	0.29	0.51	0.18	0.66	1.25	0.15	0.18	0.67
	4	0.17	0.15	0.73	0.373	0.753	1.873	0.242	0.452	1.212
	5	0.04	0.16	0.86	0.26	0.66	1.42	0.23	0.75	1.5
	6	0.08	0.04	0.36	0.282	0.892	1.912	0.09	0.63	1.72
	7	0.11	0.22	0.66	0.227	0.637	1.587	0.157	0.397	1.087
	8	0.02	0.19	1.15	0.179	0.379	1.159	0.27	0.78	1.86
	9	-0.06	0.23	1.08	0.14	0.3	2.23	0.48	1.13	2.25
	10	0.17	0.23	0.78	0.2	0.59	1.74	0.189	0.379	0.819
	Ethyl myristate
	Replicates	Starved WT males-0.1% (mV)	Starved WT males-1% (mV)	Starved WT males-10% (mV)	Starved sk-/- males-0.1% (mV)	Starved sk-/- males-1% (mV)	Starved sk-/- males-10% (mV)	Starved skr1-/- males-0.1% (mV)	Starved skr1-/- males-1% (mV)	Starved skr1-/- males-10% (mV)
	1	0.299	0.459	0.869	0.38	0.59	1.01	0.23	0.27	0.65
	2	0.44	0.52	0.85	0.48	0.57	1.18	0.31	0.47	0.95
	3	0.18	0.27	0.62	0.27	0.31	0.55	0.13	0.22	0.52
	4	0.09	0.14	0.24	0.623	0.793	1.393	0.302	0.332	0.682
	5	0.09	0.19	0.74	0.38	0.47	1.05	0.27	0.44	1.15
	6	-0.09	0.05	0.47	0.462	0.572	1.302	0.57	0.9	1.25
	7	-0.1948	0	0.23	0.597	0.717	1.407	0.377	0.527	1.067
	8	0.09	0.17	0.72	0.349	0.549	1.169	0.41	0.46	1.03
	9	-0.01	0.27	0.89	0.47	0.81	1.65	0.49	0.93	1.6
	10	0.08	0.22	0.8	0.37	0.85	1.09	0.279	0.489	0.819
	Ethyl palmitate
	Replicates	Starved WT males-0.1% (mV)	Starved WT males-1% (mV)	Starved WT males-10% (mV)	Starved sk-/- males-0.1% (mV)	Starved sk-/- males-1% (mV)	Starved sk-/- males-10% (mV)	Starved skr1-/- males-0.1% (mV)	Starved skr1-/- males-1% (mV)	Starved skr1-/- males-10% (mV)
	1	0.139	0.179	0.499	0.14	0.28	0.7	0.01	0.13	0.52
	2	0.19	0.32	0.63	0.19	0.39	1.13	0.05	0.29	0.78
	3	0.16	0.2	0.43	0.01	0.09	0.47	0.04	0.1	0.57
	4	-0.017	0.1	0.34	0.283	0.293	0.983	0.212	0.182	0.532
	5	0.03	0.12	0.41	0.28	0.47	1.11	0.1	0.17	0.51
	6	-0.05	-0.03	-0.13	0.102	0.222	0.722	0.1	0.12	0.89
	7	-0.08	0	0.59	0.247	0.387	1.167	0.177	0.327	0.867
	8	0.01	0.09	0.3	0.149	0.469	1.129	0.31	0.22	0.84
	9	-0.03	-0.02	0.3	0.13	0.34	0.95	0.34	0.7	1.34
	10	0.04	0.08	0.29	0.08	0.17	0.51	0.119	0.159	0.499
