# Supplementary material for: The neuropeptide sulfakinin is a peripheral regulator of insect behavioral switch between mating and foraging
Source: eLife. 2025 May 2;13:RP100870. doi: 10.7554/eLife.100870 (PMC12048153; doi:10.7554/eLife.100870)
Supplement: Figure 3—source data 1. [file elife-100870-fig3-data1.xlsx]

## Sheet: Figure 1A
	Figure 1A
		Successful foraging rate of fed WT females (%)
		Replicates	0 min	5 min	10 min	15 min
		1	0	5	5	10
		2	0	5	10	10
		3	0	0	5	5
		Successful foraging rate of s fed sk-/- females (%)
		Replicates	0 min	5 min	10 min	15 min
		1	0	0	5	5
		2	0	5	15	15
		3	0	10	10	15
		Successful foraging rate of s fed skr1-/- females (%)
		Replicates	0 min	5 min	10 min	15 min
		1	0	0	5	5
		2	0	5	10	10
		3	0	15.7895	15.7895	21.0526
		Successful foraging rate of starved WT females (%)
		Replicates	0 min	5 min	10 min	15 min
		1	0	40	65	80
		2	0	50	75	85
		3	0	60	90	95
		Successful foraging rate of s starved sk-/- females (%)
		Replicates	0 min	5 min	10 min	15 min
		1	0	15	30	35
		2	0	25	40	50
		3	0	25	30	40
		Successful foraging rate of s starved skr1-/- females (%)
		Replicates	0 min	5 min	10 min	15 min
		1	0	20	45	50
		2	0	10	25	30
		3	0	15	25	35

## Sheet: Figure 1B
	Figure 1B
		Successful foraging rate of fed WT males (%)
		Replicates	0 min	5 min	10 min	15 min
		1	0	0	5	10
		2	0	10.5263	10.5263	15.7895
		3	0	5	15	20
		Successful foraging rate of s fed sk-/- males (%)
		Replicates	0 min	5 min	10 min	15 min
		1	0	0	5	10
		2	0	10.5263	10.5263	15.7895
		3	0	5	15	20
		Successful foraging rate of s fed skr1-/- males (%)
		Replicates	0 min	5 min	10 min	15 min
		1	0	0	10	10
		2	0	15	20	25
		3	0	5	5	5
		Successful foraging rate of starved WT males (%)
		Replicates	0 min	5 min	10 min	15 min
		1	0	35	55	75
		2	0	40.9091	50	68.1818
		3	0	30.4348	52.1739	60.8696
		Successful foraging rate of s starved sk-/- males (%)
		Replicates	0 min	5 min	10 min	15 min
		1	0	18.75	31.25	43.75
		2	0	13.6364	18.1818	27.2727
		3	0	11.1111	22.2222	27.7778
		Successful foraging rate of s starved skr1-/- males (%)
		Replicates	0 min	5 min	10 min	15 min
		1	0	27.2727	31.8182	45.4545
		2	0	17.6471	29.4118	29.4118
		3	0	22.7273	27.2727	36.3636

## Sheet: Figure 1C
	Figure 1C
		Cumulative copulation rates within a 15-min observation period of fed and starved flies with different genotypes (%)
		Time	Fed WT (92)	Fed sk-/- (86)	Fed skr1-/- (88)	Starved WT (106)	Starved sk-/- (80)	Starved skr1-/- (76)
		0	0	0	0	0	0	0
		1	2.17391	5.81395	4.54545	0	3.75	3.94737
		2	9.78261	11.6279	13.6364	0.943396	10	15.7895
		3	13.0435	18.6047	17.0455	2.83019	18.75	18.4211
		4	18.4783	26.7442	20.4545	5.66038	26.25	25
		5	25	29.0698	27.2727	7.54717	30	28.9474
		6	26.087	31.3953	27.2727	8.49057	33.75	30.2632
		7	30.4348	33.7209	30.6818	11.3208	33.75	34.2105
		8	32.6087	34.8837	31.8182	15.0943	37.5	36.8421
		9	35.8696	37.2093	31.8182	16.9811	41.25	38.1579
		10	40.2174	40.6977	37.5	18.8679	42.5	38.1579
		11	41.3043	43.0233	44.3182	21.6981	46.25	43.4211
		12	46.7391	45.3488	44.3182	25.4717	48.75	46.0526
		13	46.7391	46.5116	44.3182	25.4717	50	47.3684
		14	46.7391	47.6744	45.4545	29.2453	50	47.3684
		15	46.7391	47.6744	45.4545	32.0755	50	47.3684

## Sheet: Figure 1D
	Figure 1D
		Cumulative courtship rates within a 15-min observation period of fed and starved flies with different genotypes (%)
		Time	Fed WT (91)	Fed sk-/-(85)	Fed skr1-/-(86)	Starved WT(98)	Starved sk-/-(80)	Starved skr1-/-(77)
		0	0	0	0	0	0	0
		1	7.69231	4.70588	4.65116	0	6.25	5.19481
		2	17.5824	15.2941	15.1163	1.02041	16.25	19.4805
		3	25.2747	21.1765	19.7674	5.10204	23.75	24.6753
		4	30.7692	29.4118	25.5814	7.14286	30	32.4675
		5	38.4615	32.9412	34.8837	11.2245	36.25	37.6623
		6	39.5604	35.2941	36.0465	16.3265	38.75	38.961
		7	39.5604	38.8235	39.5349	18.3673	38.75	42.8571
		8	45.0549	40	41.8605	25.5102	42.5	45.4545
		9	49.4505	42.3529	41.8605	26.5306	45	46.7532
		10	52.7473	47.0588	47.6744	28.5714	47.5	48.0519
		11	53.8462	48.2353	54.6512	35.7143	52.5	54.5455
		12	59.3407	50.5882	54.6512	38.7755	55	57.1429
		13	60.4396	52.9412	56.9767	39.7959	56.25	58.4416
		14	61.5385	54.1176	58.1395	42.8571	56.25	58.4416
		15	61.5385	54.1176	58.1395	45.9184	56.25	58.4416

## Sheet: Figure 1E
Figure 1E
	EAG responses to artificial food in fed and starved females of different genotypes (mV)
	Replicates	Fed WT females	Starved WT females	Fed sk-/- females	Starved sk-/- females	Fed skr1-/- females	Starved skr1-/- females
	1	0.62	1.92	0.92	1.25	0.71	0.92
	2	0.72	1.4	0.68	1.22	0.7	1.29
	3	0.82	1.39	0.6	1.24	0.84	1.28
	4	0.86	1.6	0.9	1.3	1.07	1.05
	5	0.71	1.52	0.71	1.13	0.85	0.88
	6	0.78	1.64	0.84	0.8	0.86	0.84
	7	0.9	1.54	0.88	1.2	0.86	1.1
	8	0.88	1.84	0.81	1.35	0.68	1.08
	9	0.92	1.39	0.74	1.34	0.6	1.05
	10	1.05	1.26	0.62	1.22	1.1	1.14
	11	0.76	1.62	0.91	1.25	0.46	1.1
	12	0.9	1.83	0.85	1.14	0.68	1.25

## Sheet: Figure 1F
Figure 1F
	EAG responses to artificial food in fed and starved males of different genotypes (mV)
	Replicates	Fed WT males	Starved WT males	Fed sk-/- males	Starved sk-/- males	Fed skr1-/- males	Starved skr1-/- males
	1	1.16	1.8	0.75	1.09	1.06	0.81
	2	0.49	1.3	0.66	1.53	0.49	1.01
	3	1.17	1.2	0.78	1.01	0.97	1.13
	4	0.85	1.41	0.67	1.78	0.75	0.82
	5	0.98	1.98	0.9	1.03	0.78	1.57
	6	0.39	1.78	0.41	0.93	0.59	1.41
	7	0.75	1.66	0.77	0.92	0.58	1.08
	8	0.87	1.66	1.1	1.33	0.87	0.79
	9	0.57	1.55	0.81	1.11	0.64	0.84

## Sheet: Figure 1G
Figure 1G
	EAG responses to body extracts in fed and starved females of different genotypes (mV)
	Replicates	Fed WT females	Starved WT females	Fed sk-/- females	Starved sk-/- females	Fed skr1-/- females	Starved skr1-/- females
	1	0.62	0.29	1.5	0.46	0.7	0.8
	2	0.79	0.24	1.7	0.69	1.02	1.15
	3	1.81	0.34	0.43	0.45	1.06	0.46
	4	1.45	0.3	0.343	0.55	1.31	0.45
	5	1.21	0.11	0.54	0.8	1.33	1
	6	1.82	0.18	0.64	1.03	0.89	0.63
	7	0.76	0.63	0.96	0.66	0.19	1.12
	8	1	0.69	0.99	0.95	0.59	0.68
	9	0.57	0.72	0.65	0.99	1.22	0.66
	10	0.6	0.83	0.99	0.81	1.03	1.14
	11		0.49		1.26	0.82	1.32
	12		0.62		0.77	1	0.85

## Sheet: Figure 1H
Figure 1H
	EAG responses to body extracts in fed and starved males of different genotypes (mV)
	Replicates	Fed WT males	Starved WT males	Fed sk-/- males	Starved sk-/- males	Fed skr1-/- males	Starved skr1-/- males
	1	2.12	1.37	2.71	0.87	1.72	0.22
	2	2.04	0.86	2.1	0.89	1.08	1.34
	3	2.33	0.63	1.77	2.18	0.6	0.604
	4	1.24	0.61	1.3	1.78	0.5	0.31
	5	1.47	0.5	1.45	1.59	1.05	0.27
	6	1.84	0.45	1.36	1.94	1.5	0.33
	7	1.68	0.11	1.06	2	1.42	1.65
	8	0.78	0.34	1.26	0.68	1.77	2.9
	9	0.55	0.95	0.9	1.07	1.86	0.92
	10	0.63	0.41	1.3	0.66	1.42	1.65
	11	1.34	0.28	1.38	1.1	1.81	1.14
	12	1.32			0.37	1.63	1.84
