# Supplementary material for: The neuropeptide sulfakinin is a peripheral regulator of insect behavioral switch between mating and foraging
Source: eLife. 2025 May 2;13:RP100870. doi: 10.7554/eLife.100870 (PMC12048153; doi:10.7554/eLife.100870)
Supplement: Figure 4—source data 1. [file elife-100870-fig4-data1.xlsx]

## Sheet: Figure 4B
Figure 4B
	The expression profiles of the candidate OR genes in wild-type (WT) and sk–/– flies determined by qRT-PCR
		Fed-WT			Starve-WT			Starve-sk-/-
	GeneID	R1	R2	R3	R1	R2	R3	R1	R2	R3
	Or7a.4	0.56577	0.5384	0.44743	0.89562	1.10808	1.22184	0.40414	0.3883	0.40377
	Or7a.8	0.74046	0.70426	0.68772	0.90701	1.09458	1.08124	0.31854	0.18158	0.8202
	Or10a	0.38997	0.36455	0.46482	0.88496	0.80326	1.04195	0.48946	0.43906	0.48663
	Or67d.3	1.31048	1.2441	0.97045	1.17605	1.09458	1.19197	0.57034	0.43961	0.73607
	Or74a	1.37526	1.84215	1.35492	1.91127	1.446	1.21239	0.5502	0.71079	0.8029
	Or49a	1.20497	1.02206	1.12669	0.49751	0.70392	0.59654	1.5782	0.70714	1.041
	Or63a	1.01167	1	0.95456	0.11604	0.22837	0.05568	0.72218	0.805	1.28049

## Sheet: Figure 4C
	Figure 4C
		OR63a
		Replicates	DMSO	EBE	EBU	DM	ME	EL	EM	EP	TMP	TTMP
		1	0.022378	0.041659	0.035892	0.010713	0.039226	0.117553	0.0415663	0.193279	0.000698057	0.354093
		2	-0.0186	0.041516	0.034162	0.015085	-0.00682	0.125551	0.0352452	0.190392	0.120993	0.403349
		3	0.018414	0.038915	0.042024	-0.01828	0.023729	0.167416	0.0478703	0.227512	0.075059	0.484935
		4	0.035004	0.071039	0.017455	0.021583	0.014262	0.16505	-0.0200841	0.19241	0.0469255	0.572326
		5	0.01869	0.000631	0.050544	0.033732	0.041377	0.139011	0.0149108	0.1821	0.0327309	0.420279
		6	0.053353	0.0412996	0.0404812	0.005739	-0.02568	0.107867	-0.00653555	0.223613	0.0455294
		OR49a
		Replicates	DMSO	EBE	EBU	DM	ME	EL	EM	EP	TMP	TTMP
		1	0.029443	-0.00179	0.025892	-0.01497	-0.00899	0.020472	0.023229	0.000111	0.15692	0.08105
		2	0.048379	0.022903	0.034162	0.008412	0.01589	0.004863	0.016703	0.002277	0.25306	0.0448
		3	0.011919	-0.01595	0.042024	-0.04014	-0.02845	0.059491	0.028866	0.010249	0.14966	0.06759
		4	0.016289	0.021148	0.017455	0.03105	0.03964	0.009615	0.009783	0.02113	0.254726	0.090859
		5	0.03182	0.01727	-0.01283	0.038748	0.037259	0.040376	0.000909	-0.00724	0.148989	0.026216
		6	-0.03218	0.007259	0.036667	0.022903	0.022055	0.014363	0.016533	-0.00204	0.155211	0.022702
		OR10a
		Replicates	DMSO	EBE	EBU	DM	ME	EL	EM	EP	TMP	TTMP
		1	0.042494	0.644606	0.039575	0.0524059	0.0166666	0.0733181	0.0688468	0.0453359	0.0287838	0.0591005
		2	0.0353659	0.502669	0.014983	0.0474321	0.0102687	0.0622265	0.0081888	0.0401599	0.0256932	0.0330677
		3	0.0486221	0.783553	0.068825	0.0102072	0.0376213	0.00841444	0.0397116	0.0115784	0.00676471	-0.0200891
		4	-0.0211192	0.70486	0.011651	0.0270649	0.0428735	0.0294773	0.0212129	0.0258142	0.0183019	0.0522003
		5	0.0145007	0.521579	0.002296	0.0173133	0.0205186	0.0176217	-0.000304612	0.0191923	0.0126839	0.00676471
		6	-0.00701612	0.753849	0.011777	-0.00133556	0.000426781	0.00729176	0.0327717	0.0368534	0.0436273	0.0183019
		OR7a.8
		Replicates	DMSO	EBE	EBU	DM	ME	EL	EM	EP	TMP	TTMP
		1	0.0198256	0.039575	0.346558	0.305969	0.0117546	0.031598	0.048379	0.0311688	0.0336857	0.0117385
		2	0.0239201	0.014983	0.35637	0.244886	0.0207097	0.0167952	0.0266284	0.0181907	0.00519737	0.0313878
		3	0.0232871	0.068825	0.36795	0.31441	0.0144185	-0.00126369	0.000701197	0.000974192	0.02315	0.0449031
		4	0.0229799	0.011651	0.336521	0.319658	0.0255011	0.0125151	0.0175814	0.0143529	0.0260168	0.0103938
		5	0.0108267	0.002296	0.365636	0.284957	-0.0261691	-0.0168685	-0.0220461	0.0434434	0.00113198	-0.00817501
		6	0.0194091	0.011777	0.358514	0.298486	0.012984	0.0434434	0.0145853	0.00213821	0.0178972	0.00636262
		OR7a.4
		Replicates	DMSO	EBE	EBU	DM	ME	EL	EM	EP	TMP	TTMP
		1	0.00985263	0.0117552	0.0116027	0.0232908	0.21798	0.0247355	0.0262545	0.0389575	0.0281405	0.0146319
		2	0.0321811	0.00743117	0.00584947	0.0124369	0.14645	0.0355937	0.0236026	0.0285446	0.0113159	0.0103023
		3	0.0198579	-0.00322993	0.00539791	0.0155581	0.17698	0.00377035	0.0256278	0.0187726	0.0172045	0.0193329
		4	0.0235847	0.0108387	0.0101094	-0.017583	0.201758	0.0161934	-0.037744	-0.0285752	0.00454834	0.0325864
		5	0.0112895	-0.00351905	0.0116777	0.00189041	0.164589	-0.0207209	0.0390645	0.0523691	0.0168731	0.0107161
		6	0.0204755	0.00487141	-0.00552574	0.0104211	0.157948	0.0249521	0.0218803	0.00225047	0.0300286	0.0240108

## Sheet: Figure 4D
Figure 4D
	OR49a response to TMP
	log10 (M)	Replicates 1	Replicates 2	Replicates 3
	-7	0.026784	0.031366	0.02567
	-6	0.072713	0.09958	0.08787
	-5	0.1355	0.11388	0.12404
	-4	0.15692	0.25306	0.14966
	-3	0.28292	0.23176	0.271939
	OR63a response to TTMP						OR63a response to EP						OR63a response to EL
	log10 (M)	Replicates 1	Replicates 2	Replicates 3			log10 (M)	Replicates 1	Replicates 2	Replicates 3			log10 (M)	Replicates 1	Replicates 2	Replicates 3
	-5	0.12922	0.09942	0.10285			-5	0.0132588	0.0221833	0.0255869			-5	0.017715	-0.01041	0.014983
	-4	0.20213	0.20588	0.18141			-4	0.0727901	0.0943946	0.110857			-4	0.068326	0.012846	0.009738
	-3	0.23854	0.27594	0.293			-3	0.152012	0.167815	0.121374			-3	0.09428	0.05236	0.12993
	-2	0.35409	0.40335	0.42028			-2	0.193279	0.190392	0.227512			-2	0.16742	0.16505	0.13901
	-1	0.413351	0.48493	0.57233			-1	0.253591	0.239559	0.2721			-1	0.25074	0.30104	0.22746

## Sheet: Figure 4E
Figure 4E
	OR10a response to EBE
	log10 (M)	Replicates 1	Replicates 2	Replicates 3
	-7	0.123284	0.0685301	0.142338
	-6	0.195541	0.199328	0.213893
	-5	0.247774	0.415677	0.456914
	-4	0.644606	0.502669	0.783553
	-3	0.803623	0.783279	0.83402
	OR7a.8 response to EBU						OR7a.8 response to DM
	log10 (M)	Replicates 1	Replicates 2	Replicates 3			log10 (M)	Replicates 1	Replicates 2	Replicates 3
	-5	0.103302	0.133692	0.16003			-5	0.0923707	0.128116	0.0698277
	-4	0.20688	0.182153	0.207457			-4	0.149153	0.159652	0.145902
	-3	0.306852	0.348317	0.240083			-3	0.173107	0.21879	0.258071
	-2	0.346558	0.35637	0.36795			-2	0.305969	0.244886	0.31441
	-1	0.499758	0.36795	0.348317			-1	0.410282	0.33359	0.387965
	OR7a.4 response to ME
	log10 (M)	Replicates 1	Replicates 2	Replicates 3
	-7	0.00964	0.00987	0.00873
	-6	0.01173	0.00582	0.01455
	-5	0.11488	0.0124	0.04503
	-4	0.21798	0.14645	0.17698
	-3	0.19171	0.22262	0.21742
